# Supplementary material for: Sinomenine Hydrochloride Protects against Polymicrobial Sepsis via Autophagy
Source: MDPI journal article supplement (doi:10.3390/ijms16022559), 2015-01-23
Supplement: s1 [file s1]

## Supplementary Information

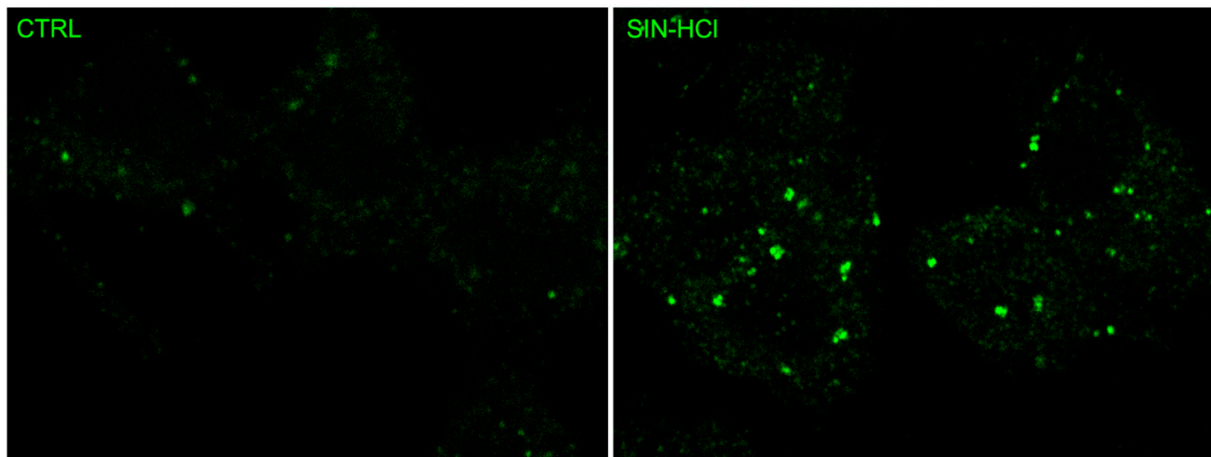

**Figure S1.** SIN-HCl increased autophagy in RAW264.7 cells. Raw264.7 cells were treated with SIN-HCl (100 mM) for 12 h before immunofluorescent detection of LC3 protein using anti-LC3 antibody.
